# Supplementary material for: Association between TERT promoter polymorphisms and acute myeloid leukemia risk and prognosis
Source: PubMed Central journal article supplement (PMC4694818; doi:10.18632/oncotarget.4668), 2015-07-23
Supplement: oncotarget-06-25109-s001.pdf [file oncotarget-06-25109-s001.pdf]

## SUPPLEMENTARY METHODS

### Mutations analysis

#### TERT core promoter, *TERT* 1062 A > T and *POT1*

PCR was performed in a total volume of 20  $\mu$ l, containing 5X MyTaq Reaction Buffer (comprising 1 mM dNTP and 3 mM MgCl<sub>2</sub>), 1  $\mu$ M for each pair primers (Supplementary Table S1), 1 U MyTaq™ DNA polymerase and 20 ng of template DNA. After an initial heat activation step at 95°C for 2 minutes, thirty five cycles of PCR were performed with the following cycling conditions: 95°C for 30 s, 61°C for 30 s, and 72°C for 30 s.

#### CEBPA mutations

The total reaction volume of 20  $\mu$ l contained 20 ng of DNA, 1  $\mu$ M of each primer, 1 U MyTaq™ DNA polymerase, 5X MyTaq Reaction Buffer, and 1  $\mu$ l of 100% dimethyl sulfoxide. The following PCR conditions were used: incubation at 94°C for 3 min, 35 cycles at 94°C for 45s (denaturation), 63°C for 45s (annealing) and 72°C for 1 min (extension) followed by the final extension at 72°C for 10 min. PCR products were sequenced in both directions forward and reverse for each primer using the ABI 3500 Genetic Analyzer (Applied Biosystems, USA). NM\_004364.4 CEBPA ID transcript was used to align the derived sequences.

#### PCR TaqMan® SNP genotyping Genotyping

A Total volume of 10  $\mu$ l per well contained 5  $\mu$ l TaqMan® Universal PCR Master Mix (2X), 0.25  $\mu$ l assay mix (40X), including the two allele-specific TaqMan® MGB probes containing distinct fluorescent dyes (FAM and VIC) and a PCR primer pair to detect specific SNV targets and 20 ng of DNA.

#### Pyrosequencing

The cycling conditions were 95°C for 2.5 min, followed by 35 cycles of 95°C denaturation for 30 s,

66.1°C and 58°C for annealing for rs10069690 and A1062T (rs35719940) mutation, respectively, and 30 s extension at 72°C for 30 s and with a final extension at 72°C for 5 min. Successful PCR was determined by 1.5% agarose gel electrophoresis and the genotypes were assessed on a PSQ96MD instrument (Qiagen, Sweden) as previously described [1]. In brief, the amplified and biotinylated PCR product was isolated with a Vacuum Prep Workstation (Qiagen, Sweden). The sequencing primers (Invitrogen, Paisley, UK) 5'-gggtgaggtggacaga-3' and 5'-tggggccaaggcg-3' for rs10069690 and rs35719940 respectively was annealed to the single-stranded DNA template for 2 min at 80°C. The plate was then transferred to the PSQ96MD instrument and sequencing was performed with the following dNTP dispensing order: cgt agc tgc and tcg atc gct for the polymorphism and the mutation respectively.

#### Quantitative real-time PCR

The relative mRNA expression was determined by real-time PCR with the TaqMan® Fast Universal PCR Master Mix (Applied Biosystems) and cDNA-specific primer/probe mixes for *TERT*, *IL-6*, *IL-1 $\beta$*  and *TNF $\alpha$*  (Hs00972656\_m1, amplicon length 79 bp, Hs00985639\_m1, amplicon length 66 bp, Hs01555410\_m1, amplicon length 91 bp and Hs01113624\_g1, amplicon length 143 bp, respectively) (Applied Biosystems). The qPCR mix contained 2  $\mu$ l of sample cDNA, 5  $\mu$ l of TaqMan Fast Universal Master mix (2X), 0.5  $\mu$ l assay mix and 2.5  $\mu$ l of milli-Q water with the following cycling conditions; 20 s in 95°C and 40 cycles consisted of 3 s in 95°C, 30 s in 60°C.

## REFERENCE

1. Green H, Soderkvist P, Rosenberg P, et al. mdr-1 single nucleotide polymorphisms in ovarian cancer tissue: G2677T/A correlates with response to paclitaxel chemotherapy. Clin Cancer Res. 2006; 12:854–859.

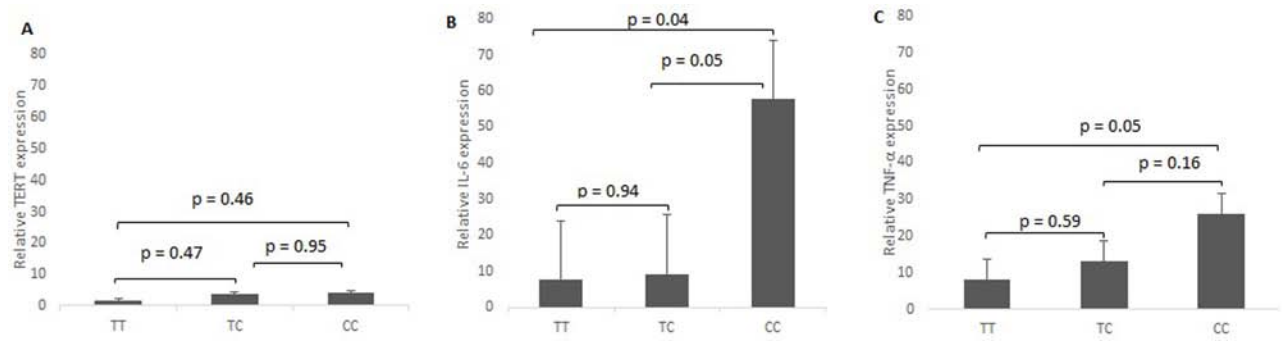

**Supplementary Figure S1: Expression levels of TERT, IL-6 and TNF $\alpha$  in different rs2853669 genotypes, TERT is 2.17 fold enhanced in CC genotype compared to TT ( $p = 0.46$ ) A. however IL-6 is 6.25 fold enhanced in CC genotype compared to TT ( $p = 0.04$ ) B. and TNF $\alpha$  expression was 3.58 fold higher with CC genotype ( $p = 0.05$ ) C.**

**Supplementary Table S1: *TERT*, *POT1* and *CEBPA* primers**

|                 | Forward primer            | Reverse primer               |
|-----------------|---------------------------|------------------------------|
| TRET promoter   | GGCCGATTCGACCTCTCT        | AGCACCTCGCGGTAGTGG           |
| TERT EX15       | AGCTTTCCGGTGTCTCCTG       | TCTGCACTTCAGCAGCATCT         |
| TERT rs10069690 | biotin-TCCTGGCCGCATGTGTGT | AGAGTGTGGGGTGAGGTGGA         |
| TERT rs35719940 | TCTCCTGGGAGGGGAGCT        | biotin-AGGAGTGGCACGTAGGTGACA |
| POT1-EX5        | AGCATGTAATCACATTGGAGGT    | TCTATGTGTGTGGCATATACAGG      |
| POT1-EX6        | CATGGATTTGCTGCTAATATGAT   | TGGAACCGTGTTCCCTAAATC        |
| POT1-EX7        | TGAAAGCCAAGAAAATGTCTC     | TGAAAAGCTTGCTGTTCATGT        |
| POT1-EX8        | TTCCAGTTTCTTTGGTTCGT      | CACAGCATGCTTTATCTCATCA       |
| POT1-EX9        | TGCCAATATTCAGAGGCATAAG    | AAAAATTTACATGAGCAAAAATCAC    |
| POT1-EX10       | ATTGGCCCCATATTGGTTAT      | GCACAAAAGGCTAGGGA ACT        |
| POT1-EX18       | TCTAGATTATCTTTTAATTGGACA  | ACTTCTAAAAGTCCACAGAGTACA     |
| CEBPA-1         | CCTGCCGGGTATAAAAAGCTG     | AGCCTGCCGTCCAGGTAG           |
| CEBPA-2         | GCTGGGCGGCATCTGCGA        | CCCCGACGCGCTCGTACAGG         |
| CEBPA-3         | CCGGCTACCTGGACGGCAGG      | CGTTGCTGTTCTTGTCCACCGACTTCTT |
| CEBPA-4         | GTGGACAAGAACAGCAACGA      | AGGCACCGGAATCTCCTAGT         |
